# Supplementary material for: Shape-controlled synthesis of Co3O4 nanostructures derived from coordination polymer precursors and their application to the thermal decomposition of ammonium perchlorate
Source: Royal Society of Chemistry journal article supplement (doi:10.1039/c2ce25713k), 2012-01-01
Supplement: c2ce25713k.pdf [file c2ce25713k.pdf]

*Electronic Supplementary Information (ESI)*

**Shape-controlled synthesis of  $\text{Co}_3\text{O}_4$  nanostructures derived from coordination polymer precursors and their application to the thermal decomposition of ammonium perchlorate**

**Li-Na Jin, Qing Liu and Wei-Yin Sun\***

*Coordination Chemistry Institute, State Key Laboratory of Coordination Chemistry, School of Chemistry and Chemical Engineering, Nanjing National Laboratory of Microstructures, Nanjing University, Nanjing 210093, China. E-mail: sunwy@nju.edu.cn; Fax: +86 25 83314502; Tel: +86 25 83593485*

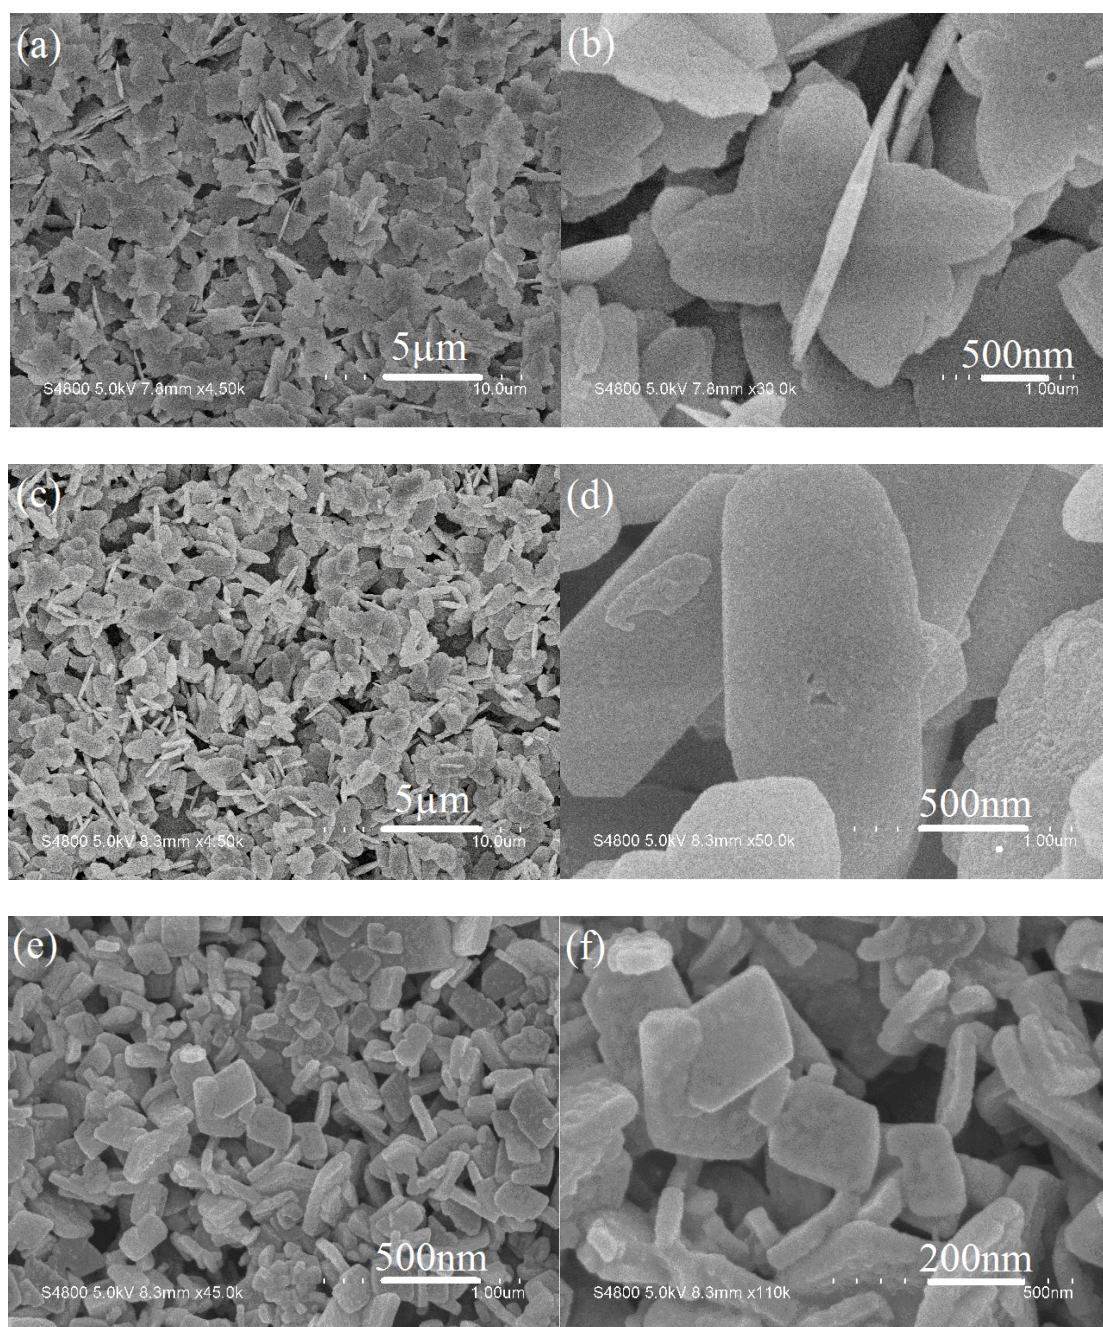

**Fig. S1** SEM images of the as-prepared precursors: (a, b) sample 3, (c, d) sample 5 and (e, f) sample 6.

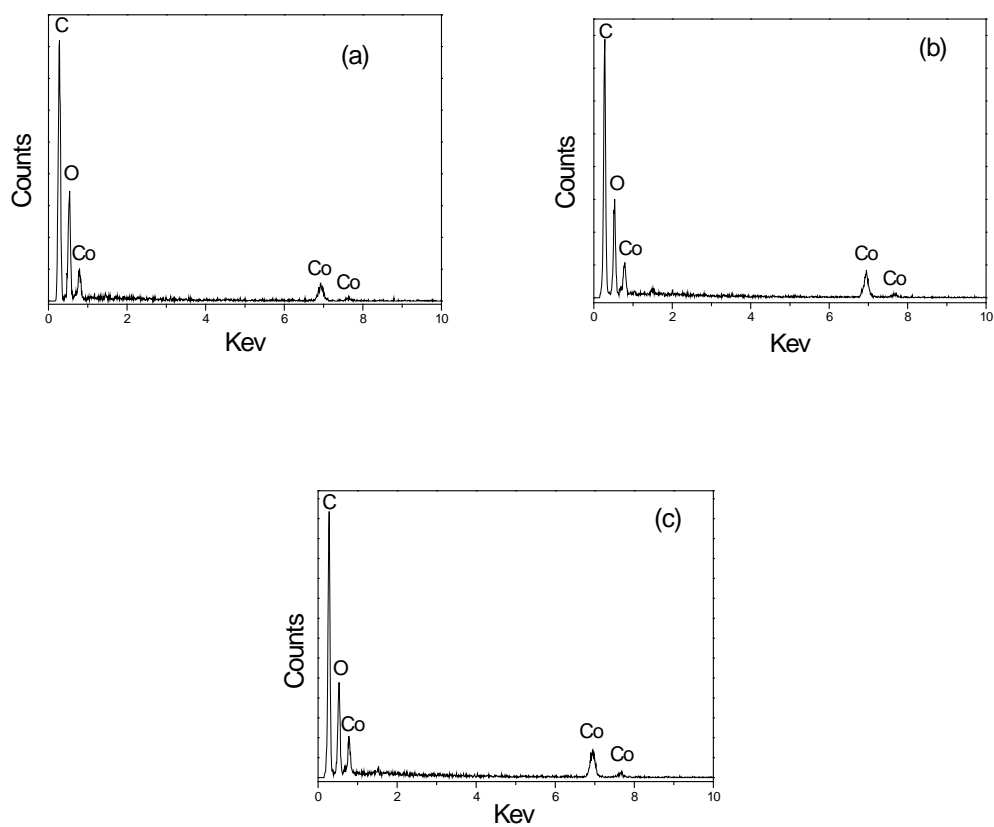

**Fig. S2** EDS spectra of the as-prepared precursors: (a) sample A, (b) sample B and (c) sample C.

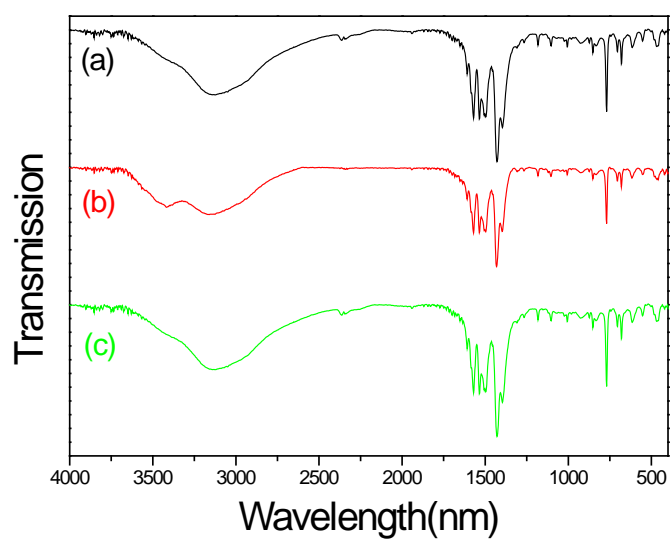

**Fig. S3** FT-IR spectra of the as-prepared precursors: (a) sample A, (b) sample B and (c) sample C.

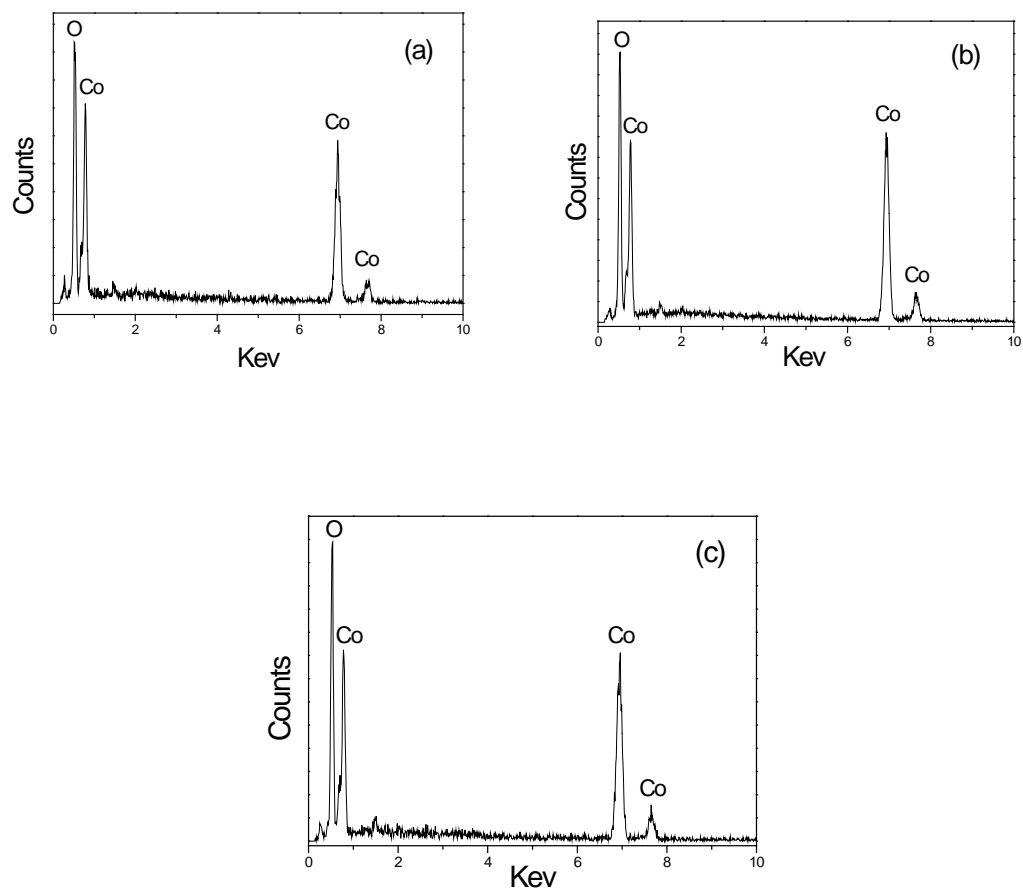

**Fig. S4** EDS spectra of the as-prepared  $\text{Co}_3\text{O}_4$  nanostructures: (a) flower-like architectures, (b) multilayer stacked structures, (c) nanosheets.
